# Supplementary material for: MtABCG20 is an ABA exporter influencing root morphology and seed germination of Medicago truncatula
Source: PubMed Central journal article supplement (PMC6850635; doi:10.1111/tpj.14234), 2019-03-06
Supplement: TPJ-98-511-s001.pdf [file TPJ-98-511-s001.pdf]

## SUPPORTING INFORMATION

**Figure S1.** Promoter activity analyses of *MtABCG20* in transgenic *M. truncatula* roots.

**Figure S2.** Promoter activity analyses of *MtABCG20* in transgenic *M. truncatula* nodule.

**Figure S3.** Phenotypic characterization of *mtabcg20* mutants.

**Figure S4.** Expression of MtABCG20 in *N. tabacum* BY-2 cells.

**Figure S5.** Plasma membrane localization of MtABCG20 in BY2 cells.

**Figure S6.** ABA transport assay in BY2 cells.

**Figure S7.** Experimental scheme of ABA application onto Medicago embryo.

**Figure S8.** Real-time PCR expression analyses of *MtHAI2* and *MtEXP1* in embryo axes.

**Figure S9.** Real-time PCR expression analyses of *MtHAI2* in cotyledons.

**Figure S10.** Changes of the selected (clustering with *AtABCG25*) half-size *MtABCGs* expression in roots after exogenous ABA application.

**Figure S11.** Phylogenetic tree of half-size ABCG proteins from *Arabidopsis thaliana* and *Medicago truncatula*.

**Table S1.** Accession numbers of *Medicago truncatula* half-size ABCG genes (WBC).

**Table S2.** List of primers used in this study.

## Supporting Figures

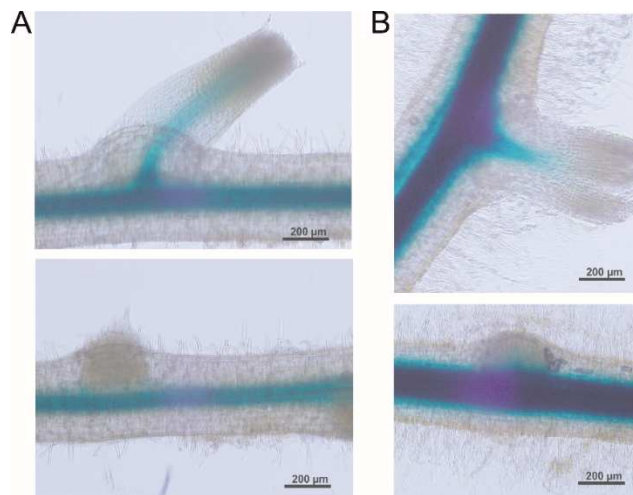

**Figure S1.** Promoter activity analyses of *MtABCG20* in transgenic *M. truncatula* roots. (A) Control, untreated transgenic roots. (B) Transgenic roots treated by 10  $\mu$ M ABA.

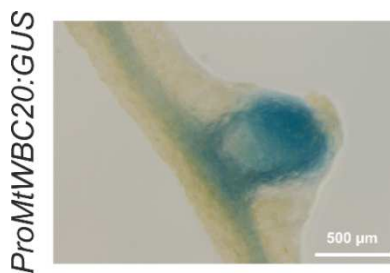

**Figure S2.** Promoter activity analysis of *MtABCG20* in transgenic *M. truncatula* nodule.

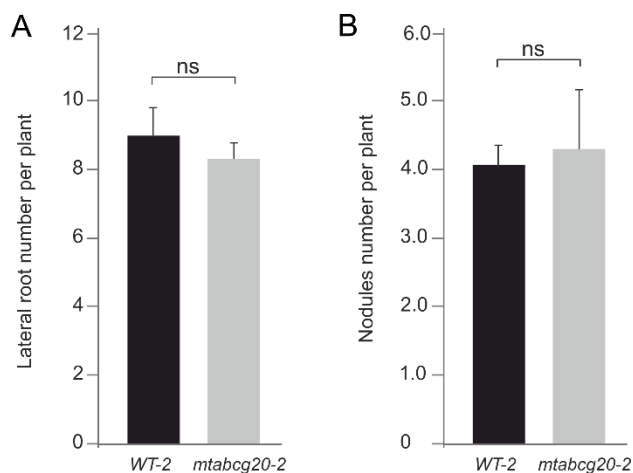

**Figure S3.** Phenotypic characterization of *mtabcg20* mutants. (A) Average lateral root number per plant in WT and *mtabcg20* plants. All plants were grown for four weeks on  $\frac{1}{2}$  MS medium. Data represent the mean  $\pm$  SD of N=5, n=5. (B) Average nodule number per plant in WT and *mtabcg20* plants. 3-day-old seedlings, were inoculated with *S. meliloti* and grown on modified Fahraeus (-N) medium. At 21 days post-inoculation (dpi), nodule numbers were counted. The data represent the mean  $\pm$  SD of N=5, n=5.

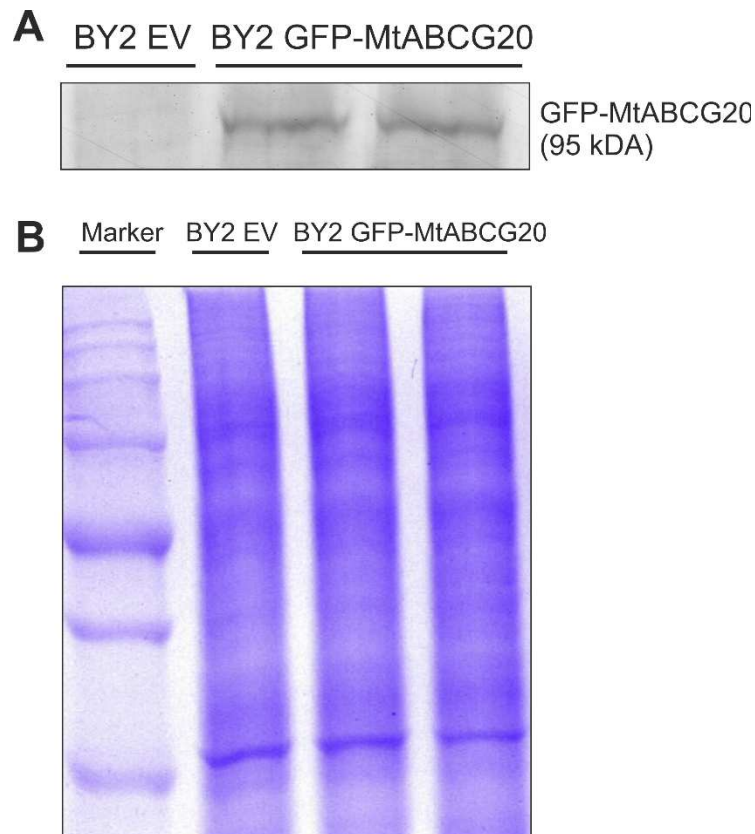

**Figure S4.** Expression of MtABCG20 in *N. tabacum* BY-2 cells. (A) Western blot analysis of the crude membranes (30  $\mu$ g), obtained from BY2 transformed with empty vector (EV) and BY2 MtABCG20-overexpressing lines. Microsomal fractions were isolated as previously described (Jasinski et al., 2001) from 300 mg of BY2 cells. The proteins were separated by SDS-PAGE and transferred to a polyvinylidene fluoride membrane (Millipore) by electroblotting (semi-dry; apparatus; Bio-Rad). The membrane was incubated with a primary Anti-GFP from mouse (Roche) diluted 1/1000 and the secondary alkaline phosphatase-conjugated goat anti-mouse IgG (Abcam) diluted 1/15000. (B) Coomassie blue-stained gel with crude membrane fraction as a loading control. M - Perfect<sup>TM</sup> Tricolor Protein Ladder (EURx).

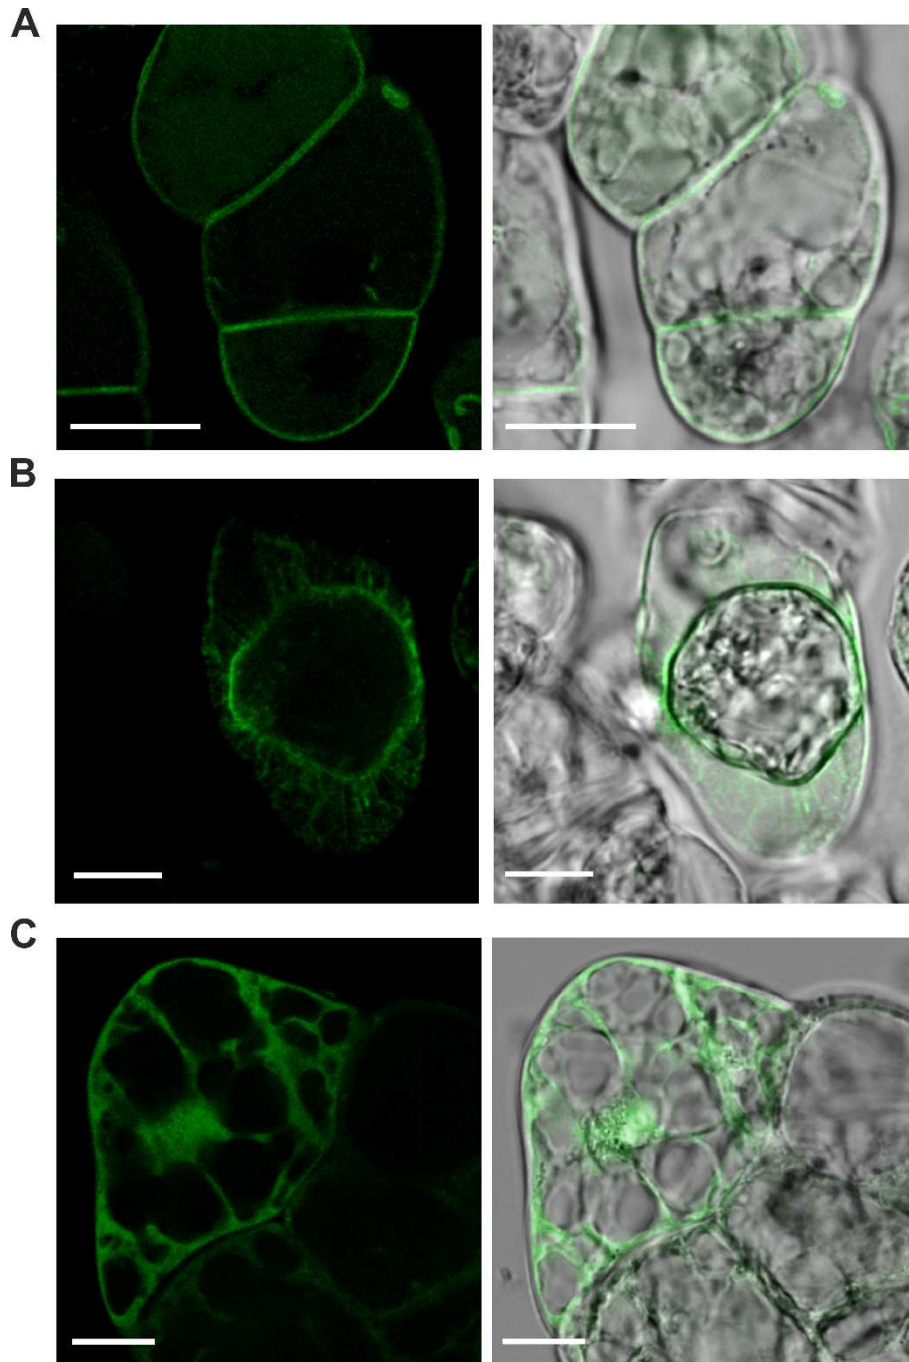

**Figure S5.** Plasma membrane localization of MtABCG20 in BY2 cells. (A) Non-plasmolysed BY2 cell expressing the fusion protein GFP-MtABCG20. GFP signal was localized on the surface of cells (B) Plasmolysed (5% NaCl for 10 min) BY-2 cells expressing the fusion protein GFP-MtABCG20. GFP signal was distributed on a plasma membranes and Hechtian strands. (C) Control BY2 cell expressing free cytoplasmic GFP. Bars = 15 µm.

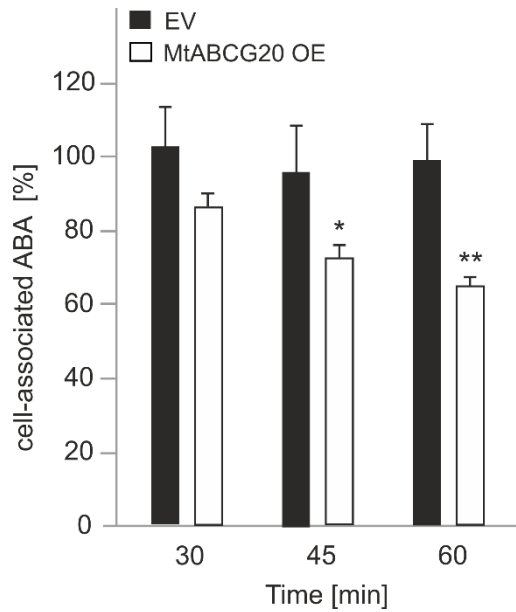

**Figure S6.** ABA transport assay in BY2 cells. ABA efflux from BY2 control (EV) and *MtABCG20*-overexpressing cell lines, conducted at 18°C and monitored by HPLC/MS. The 100% value represents the quantity of cell-associated ABA, defined as the ratio of the single-ion chromatogram peak area to the internal standard, at the time 0 (T<sub>0</sub>). Values represent the mean of three experiments ± SD. Significant differences between control and overexpressing lines determined by Student's t-test are indicated: \*P < 0.05, \*\*P < 0.01.

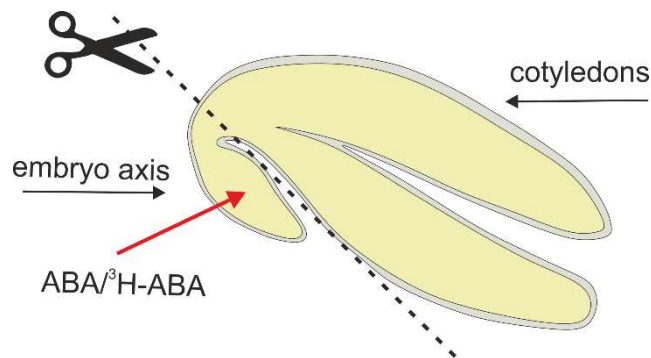

**Figure S7.** Experimental scheme of ABA application onto Medicago embryo.

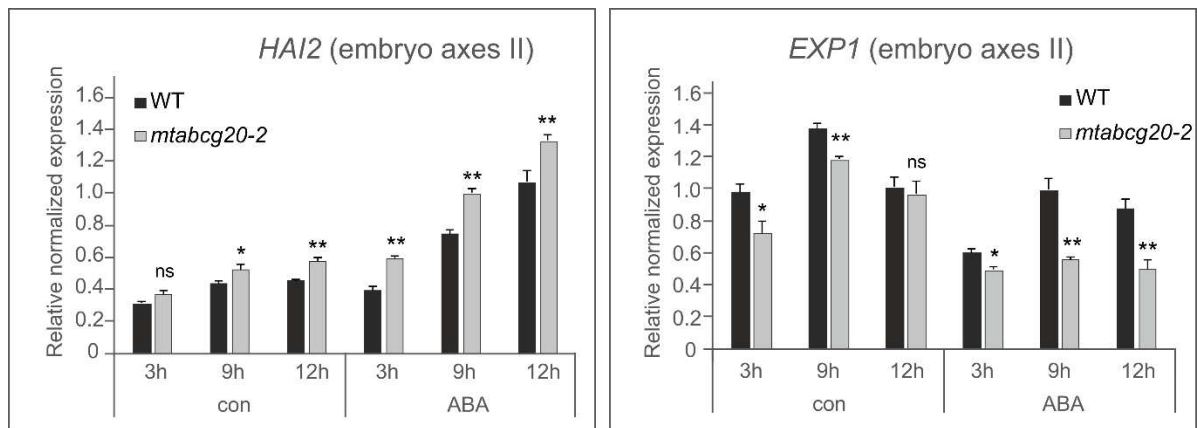

**Figure S8.** The second biological replicate of real-time PCR expression analyses of *MtHAI2* and *MtEXP1* in embryo axes derived from WT and *mtwbc20* dissected embryos. Embryos were untreated or treated with ABA applied onto the hypocotyl-radicle region. Transcript levels were normalized to the *Actin* gene. The data represent the mean  $\pm$  SD of three technical repeats. Significant differences from the WT plants determined by Student's t-test are indicated: \* $P < 0.05$ , \*\* $P < 0.01$ .

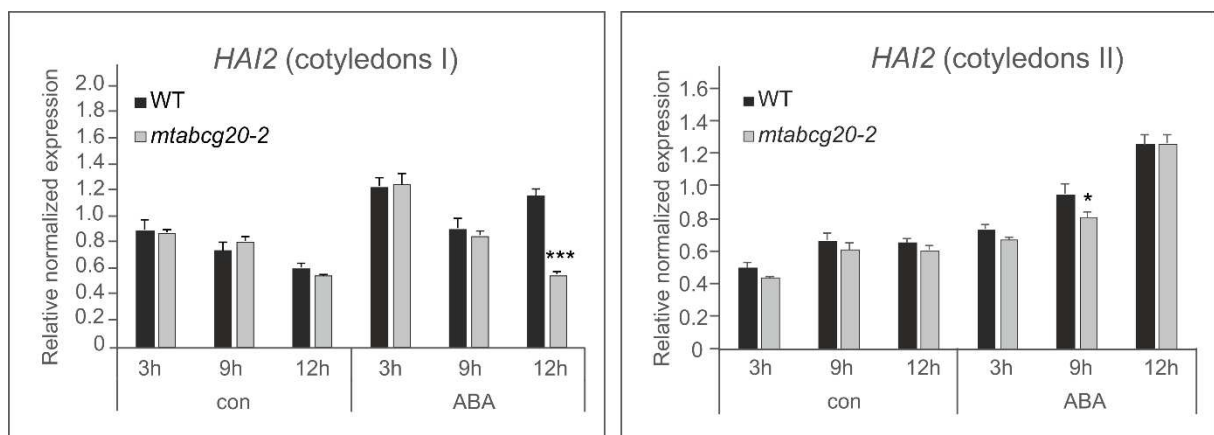

**Figure S9.** Two biological replicates of real-time PCR expression analyses of *MtHAI2* in cotyledons derived from WT and *mtwbc20* dissected embryos. Embryos were untreated or treated with ABA applied to the hypocotyl-radicle region. Transcript levels were normalized to the *Actin* gene. The data represent the mean  $\pm$  SD of three technical repeats. Significant differences from the WT plants determined by Student's t-test are indicated: \* $P < 0.05$ , \*\*\* $P < 0.001$ .

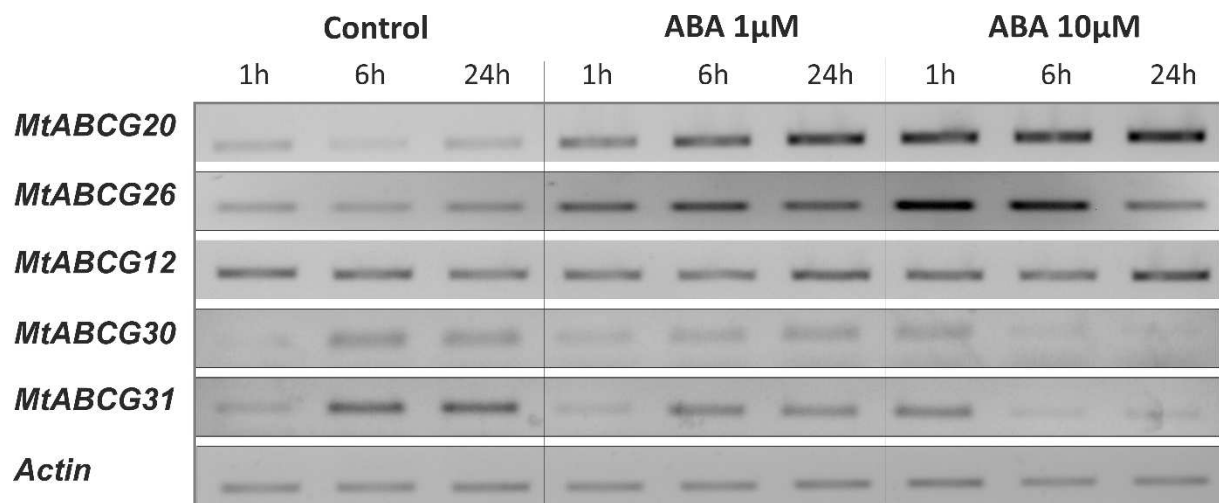

**Figure S10.** Changes of the selected (clustering with *AtABCG25*) half-size *MtABCGs* expression levels in roots after exogenous ABA application. Reverse-transcriptase polymerase chain reaction (RT-PCR) analysis of the half-size *MtABCGs* mRNA accumulation in control and ABA (1  $\mu$ M and 10  $\mu$ M) treated roots at the indicated time points. The *Actin* gene transcript was used as an internal control.

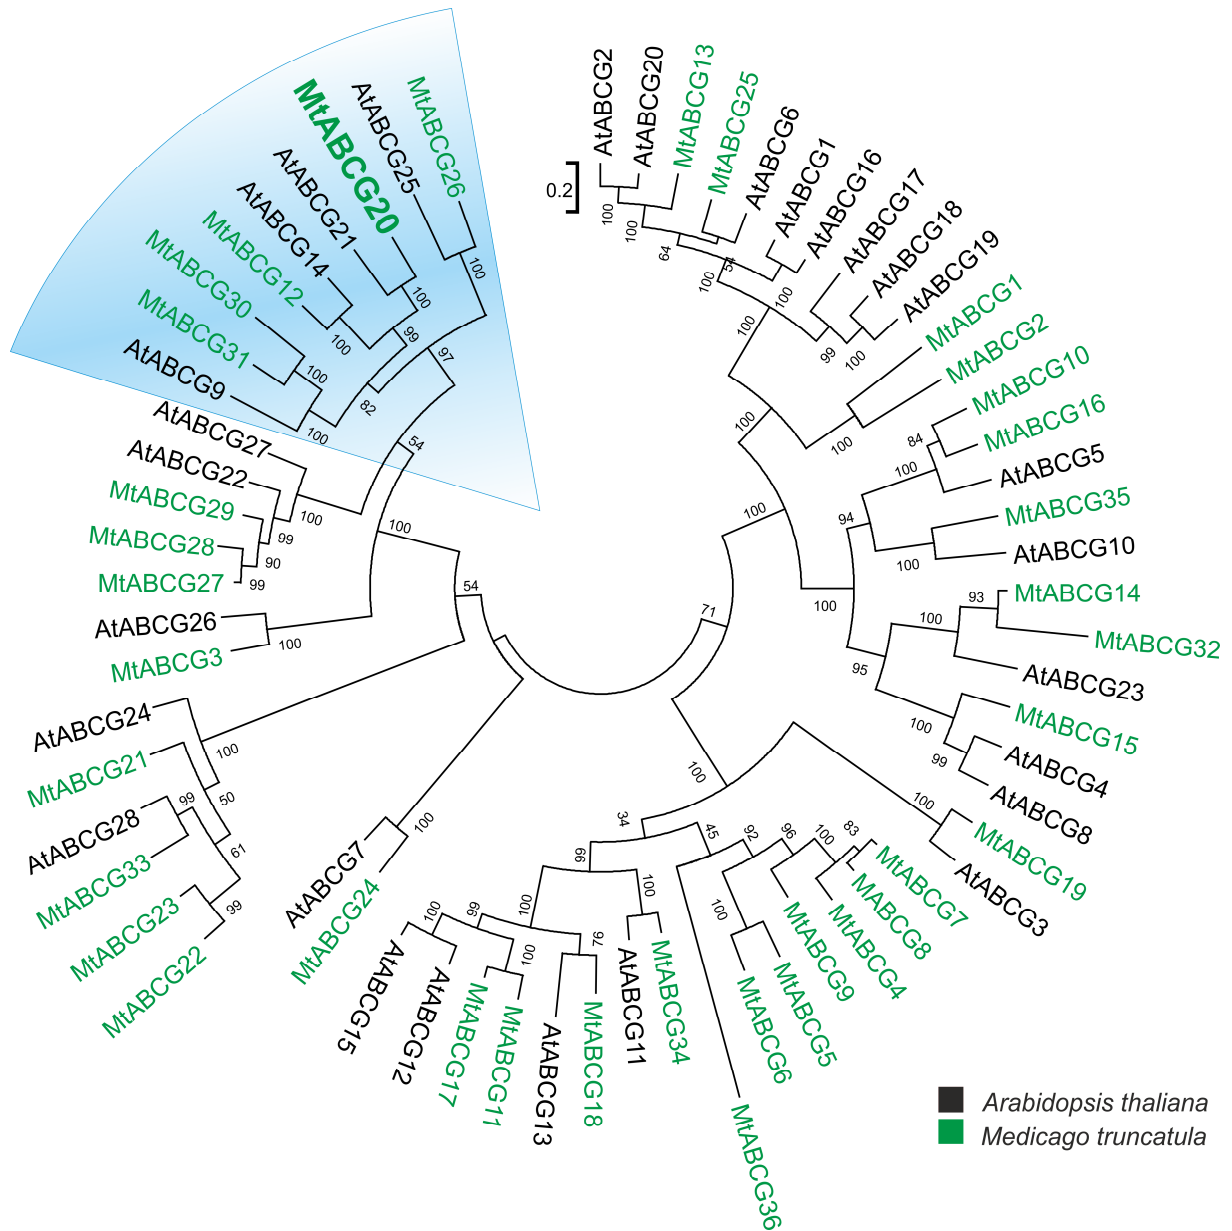

**Figure S11.** Phylogenetic tree of half-size ABCG proteins from *Arabidopsis thaliana* and *Medicago truncatula*. A maximum likelihood tree (bootstraps: 1000) was conducted using MEGA 6.0 software based on the amino acid sequences after multiple sequence alignment generated with MUSCLE. The cluster with described ABA transporters (AtABCG25 and MtABCG20) is highlighted.



## Supporting Tables

**Table S1.** Accession numbers of *Medicago truncatula* half-size *ABCG* genes (*WBC*).

| <b>NAME</b>     | <b>NAME*</b>             | <b>LOCUS</b>  |
|-----------------|--------------------------|---------------|
| <i>MtABCG1</i>  | <i>MtWBC1/MtSTR1**</i>   | Medtr8g107450 |
| <i>MtABCG2</i>  | <i>MtWBC2/MtSTR2**</i>   | Medtr5g030910 |
| <i>MtABCG3</i>  | <i>MtWBC3</i>            | Medtr5g096390 |
| <i>MtABCG4</i>  | <i>MtWBC4</i>            | Medtr4g054020 |
| <i>MtABCG5</i>  | <i>MtWBC5/MtABCG3***</i> | Medtr4g093845 |
| <i>MtABCG6</i>  | <i>MtWBC6</i>            | Medtr4g094090 |
| <i>MtABCG7</i>  | <i>MtWBC7</i>            | Medtr4g094060 |
| <i>MtABCG8</i>  | <i>MtWBC8</i>            | Medtr4g094050 |
| <i>MtABCG9</i>  | <i>MtWBC9</i>            | Medtr4g094010 |
| <i>MtABCG10</i> | <i>MtWBC10</i>           | Medtr8g093840 |
| <i>MtABCG11</i> | <i>MtWBC11</i>           | Medtr4g076900 |
| <i>MtABCG12</i> | <i>MtWBC12</i>           | Medtr5g025470 |
| <i>MtABCG13</i> | <i>MtWBC13</i>           | Medtr7g100120 |
| <i>MtABCG14</i> | <i>MtWBC14</i>           | Medtr4g116540 |
| <i>MtABCG15</i> | <i>MtWBC15</i>           | Medtr1g099570 |
| <i>MtABCG16</i> | <i>MtWBC16</i>           | Medtr3g096410 |
| <i>MtABCG17</i> | <i>MtWBC17</i>           | Medtr4g076940 |
| <i>MtABCG18</i> | <i>MtWBC18</i>           | Medtr4g076970 |
| <i>MtABCG19</i> | <i>MtWBC19</i>           | Medtr2g095390 |
| <i>MtABCG20</i> | <i>MtWBC20</i>           | Medtr1g093990 |
| <i>MtABCG21</i> | <i>MtWBC21</i>           | Medtr1g094660 |
| <i>MtABCG22</i> | <i>MtWBC22</i>           | Medtr1g063920 |
| <i>MtABCG23</i> | <i>MtWBC23</i>           | Medtr7g101780 |
| <i>MtABCG24</i> | <i>MtWBC24</i>           | Medtr1g108340 |
| <i>MtABCG25</i> | <i>MtWBC25</i>           | Medtr1g115790 |
| <i>MtABCG26</i> | <i>MtWBC26</i>           | Medtr1g096580 |
| <i>MtABCG27</i> | <i>MtWBC27</i>           | Medtr1g054935 |
| <i>MtABCG28</i> | <i>MtWBC28</i>           | Medtr1g054960 |
| <i>MtABCG29</i> | <i>MtWBC29</i>           | Medtr7g106880 |
| <i>MtABCG30</i> | <i>MtWBC30</i>           | Medtr8g059150 |
| <i>MtABCG31</i> | <i>MtWBC31</i>           | Medtr2g079980 |
| <i>MtABCG32</i> | <i>MtWBC32</i>           | Medtr3g040670 |
| <i>MtABCG33</i> | <i>MtWBC33</i>           | Medtr4g058000 |
| <i>MtABCG34</i> | <i>MtWBC34</i>           | Medtr6g066240 |
| <i>MtABCG35</i> | <i>MtWBC35</i>           | Medtr2g078080 |
| <i>MtABCG36</i> | <i>MtWBC36</i>           | Medtr4g094080 |

*MtABCG/MtWBC* have been identified in *M.truncatula* genome, version Mt4.0v2

<http://www.medicagogenome.org/> (Tang et al., 2014)

\* *MtWBC1-MtWBC25* (Banasiak and Jasinski, 2014);

\*\* (Gutjahr et al., 2012);

\*\*\* (Luginbuehl et al., 2017).

**Table S2.** List of primers used in this study.

**A. Primers for Real-Time PCR/ddPCR/semi-quantitative PCR analyses**

| <b>Genes</b>     | <b>Forward primers</b>              | <b>Reverse primers</b>             |
|------------------|-------------------------------------|------------------------------------|
| <i>MtABCG20</i>  | 5'- TCT CAT GGA TGT TAA GCA GG -3'  | 5'- CTC CCC ACA TAT TAC CAA GC -3' |
| <i>MtHAI2</i>    | 5'-CATTGGCGAGGAATAGTTCG-3'          | 5'-TGTCCAGACACAGTACACG-3'          |
| <i>MtEXP1</i>    | 5'-GTATAGGAGAGTTGGGTGC-3'           | 5'-ATAGCTGTACGAGTCTTCC-3'          |
| <i>MtNCED</i>    | 5'-TTCTATTCAGCTTCTTCTCG-3'          | 5'-GTAAAATCTCTACTCACAGACC-3'       |
| <i>MtGPAT5</i>   | 5'-TTC CTA CCG TGA GAC TAA CC-3'    | 5'-CTT TCC GAG TAA AGT TAG TGC-3'  |
| <i>abi1-1</i>    | 5'-CTT CCA TTA TCC GTT GAC C -3'    | 5'-CAC ACT TAT GTT GTC TTT GC -3'  |
| <i>Mtβ-Actin</i> | 5'-GTA $\beta$ CTTTCCAGCAGATGTGG-3' | 5'-AACCTACAGACATCCAGTGG-3'         |

**B. Promoters activity analyses (gene specific sequences underlined)**

| <b>DNA fragments</b>    | <b>Forward primers</b>                               | <b>Reverse primers</b>                                  |
|-------------------------|------------------------------------------------------|---------------------------------------------------------|
| <i>PrABCG20-GUS</i>     | 5'- atgaattc <u>GGACGAGTTATTTGTTTAGG</u> -3'         | 5'-taggatcc <u>ATCTTAGATATAAGATAAAGTTTTG</u> -3'        |
| <i>PrABCG20-NLS-GFP</i> | 5'-tagtggaatgggtcgaa <u>GGACGAGTTATTTGTTTAGG</u> -3' | 5'-ttatggagtgggtcgaa <u>CTTAGATATAAGATAAAGTTTTG</u> -3' |

**C. Primers used for cloning of MtWBC20 cDNA (gene specific sequences underlined)**

| <b>DNA fragment</b>       | <b>Forward primers</b>                                          | <b>Reverse primers</b>                                       |
|---------------------------|-----------------------------------------------------------------|--------------------------------------------------------------|
| <i>MtABCG20</i>           | 5'- <u>ACTTTGAGTTTATCCTCTAGCC</u> -3'                           | 5'- <u>GTTAGTAACACTGACACAGG</u> -3'                          |
| <i>MtABCG20</i> Ascl/Pacl | 5'-ggcgcgcc <u>TCTTATATCTAAGATGATGC</u> -3'                     | 5'-ttaattaa <u>GGTTGGACCCTAGACACGC</u> -3'                   |
| <i>MtABCG20</i> Gateway   | 5'-ggggacaagttgtacaaaaagcaggctt <u>CTTATATCTAAGATGATGCC</u> -3' | 5'- ggggaccacttgtacaagaaagctgggtc <u>GGCATTTAGGTTGCC</u> -3' |

## Supplementary Reference

- Banasiak, J., Jasinski, M. (2014). Defence, symbiosis and ABCG transporters. In *Plant ABC transporters* (Springer: Heidelberg), p.163-184.
- Gutjahr, C., Radovanovic, D., Geoffroy, J., Zhang, Q., Siegler, H., Chiapello, M., Casieri, L., An, K., An, G., Guiderdoni, E., et al. (2012). The half-size ABC transporters STR1 and STR2 are indispensable for mycorrhizal arbuscule formation in rice. *Plant J* 69:906-920.
- Jasinski, M., Stukkens, Y., Degand, H., Purnelle, B., Marchand-Brynaert, J., and Boutry, M. (2001). A plant plasma membrane ATP binding cassette-type transporter is involved in antifungal terpenoid secretion. *Plant Cell* 13:1095-1107.
- Luginbuehl, L.H., Menard, G.N., Kurup, S., Van Erp, H., Radhakrishnan, G.V., Breakspear, A., Oldroyd, G.E.D., and Eastmond, P.J. (2017). Fatty acids in arbuscular mycorrhizal fungi are synthesized by the host plant. *Science* 356:1175-1178.
- Tang, H., Krishnakumar, V., Bidwell, S., Rosen, B., Chan, A., Zhou, S., Gentzbittel, L., Childs, K.L., Yandell, M., Gundlach, H., et al. (2014). An improved genome release (version Mt4.0) for the model legume *Medicago truncatula*. *BMC Genomics* 15:312.
